# Supplementary material
Source: PubMed Central journal article supplement (PMC2704307)
Supplement: 2008.001339_1.pdf [file 2008.001339_1.pdf]

# Adoptive immunotherapy mediated by *ex vivo* expanded natural killer T cells against CD1d-expressing lymphoid neoplasms

Davide Bagnara,<sup>1</sup> Adalberto Ibatici,<sup>2</sup> Mirko Corselli,<sup>2</sup> Nadia Sessarego,<sup>2</sup> Claudya Tenca,<sup>1</sup> Amleto De Santanna,<sup>3</sup> Andrea Mazzarello,<sup>1</sup> Antonio Daga,<sup>4</sup> Renzo Corvò,<sup>5</sup> Giulio De Rossi,<sup>6</sup> Francesco Frassoni,<sup>2</sup> Ermanno Ciccone,<sup>1</sup> and Franco Fais<sup>1</sup>

<sup>1</sup>Human Anatomy, Department of Experimental Medicine, University of Genoa; <sup>2</sup>Centro Cellule Staminali e Terapia Cellulare, Ospedale San Martino, Genoa; <sup>3</sup>Histology Sections, Department of Experimental Medicine, University of Genoa; <sup>4</sup>Department of Translational Oncology and <sup>5</sup>Department of Otolaryngology, IST-National Cancer Research Institute, Genoa, and <sup>6</sup>Department of Pediatric Hematology and Oncology, Ospedale Bambino Gesù, Rome, Italy

Citation: Bagnara D, Ibatici A, Corselli M, Sessarego N, Tenca C, De Santanna A, Mazzarello A, Daga A, Corvò R, De Rossi G, Frassoni F, Ciccone E, and Fais F. Adoptive immunotherapy mediated by *ex vivo* expanded natural killer T cells against CD1d-expressing lymphoid neoplasms. *Haematologica* 2009;doi:10.3324/haematol.2008.001339

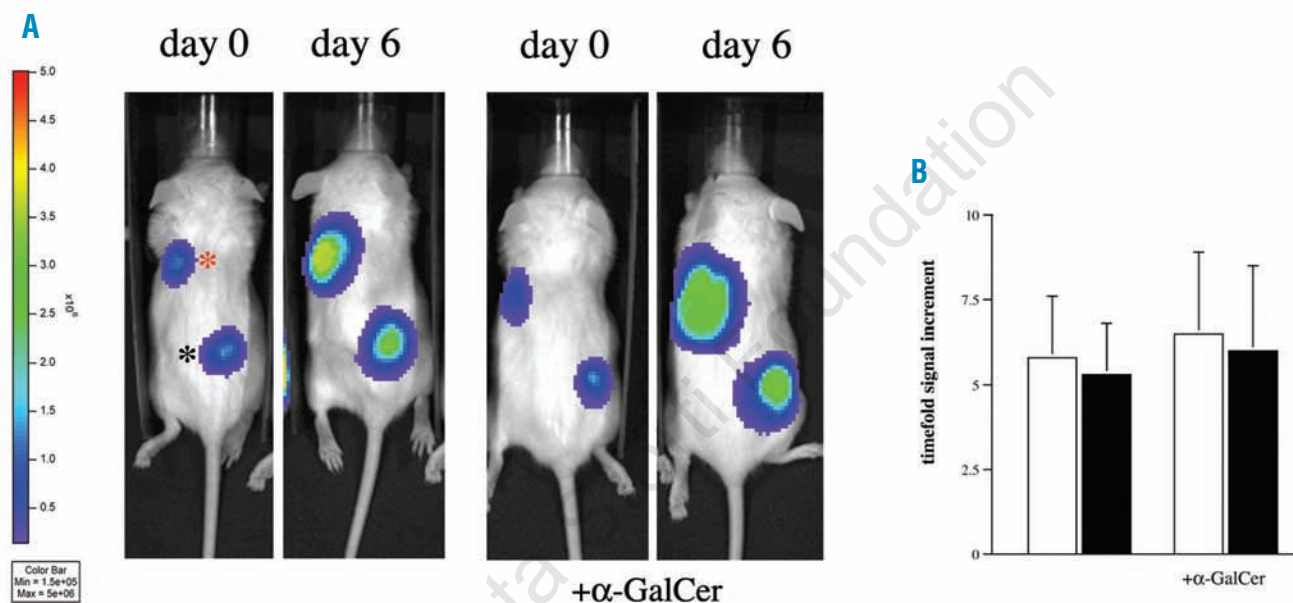

**Online Supplementary Figure S1.** FfLuc<sup>+</sup>C1R cell growth in NOD/SCID mice treated with α-GalCer only. (A) Mice were engrafted with  $2 \times 10^6$  C1R-CD1c (red asterisk) and -CD1d (black asterisk) cells. At day 0 mice were imaged and treated with 2 μg of α-GalCer. Nodule growth was again evaluated at day 6. (B) Histograms representing the relative growth recorded at day 6. Representation of luc<sup>+</sup>C1R-CD1c (red asterisk) and luc<sup>+</sup>C1R-CD1d (black asterisk) nodule growth curves. Values indicate as the timefold signal increment obtained through the ratio of the light intensity values recorded at day 6 to value recorded at day 0. The data are representative of three experiments.
